# Supplementary material for: An Integrative Study of Scrophularia takesimensis Nakai in an Ovalbumin-Induced Murine Model of Asthma: The Effect on T Helper 2 Cell Activation
Source: MDPI journal article supplement (doi:10.3390/pharmaceutics16040529), 2024-04-12
Supplement: s1 [file s1]

## ***Supplementary Material***

### **An Integrative Study of *Scrophularia takesimensis* Nakai in an Ovalbumin-Induced Murine Model of Asthma: The Effect on T Helper 2 Cell Activation**

Yun-Soo Seo<sup>†</sup>, Jun-Ho Song<sup>†</sup>, Hyo Seon Kim, Hyeon Hwa Nam, Sungyu Yang, Goya Choi, Sung-Wook Chae, Jeongmin Lee, Bokyoung Jung, Joong-Sun Kim\* and Inkyu Park\*

\*Correspondence:

Joong-Sun Kim: [centraline@jnu.ac.kr](mailto:centraline@jnu.ac.kr) and Inkyu Park: [pik6885@cwnu.ac.kr](mailto:pik6885@cwnu.ac.kr)

<sup>†</sup> These authors contributed equally to this work.

Supplementary Figures and Tables

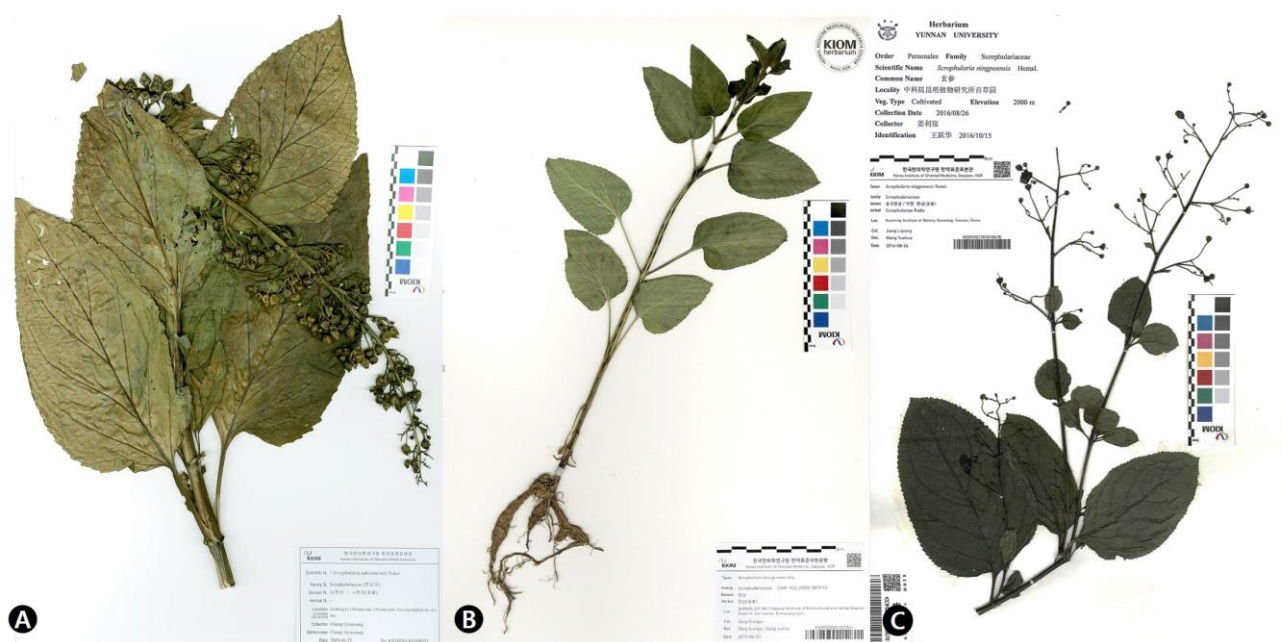

**Fig. S1. Voucher specimens of three *Scrophularia* species. A. *S. takesimensis* Nakai. B. *S. buergeriana* Miq. C. *S. ningpoensis* Hemsl.**

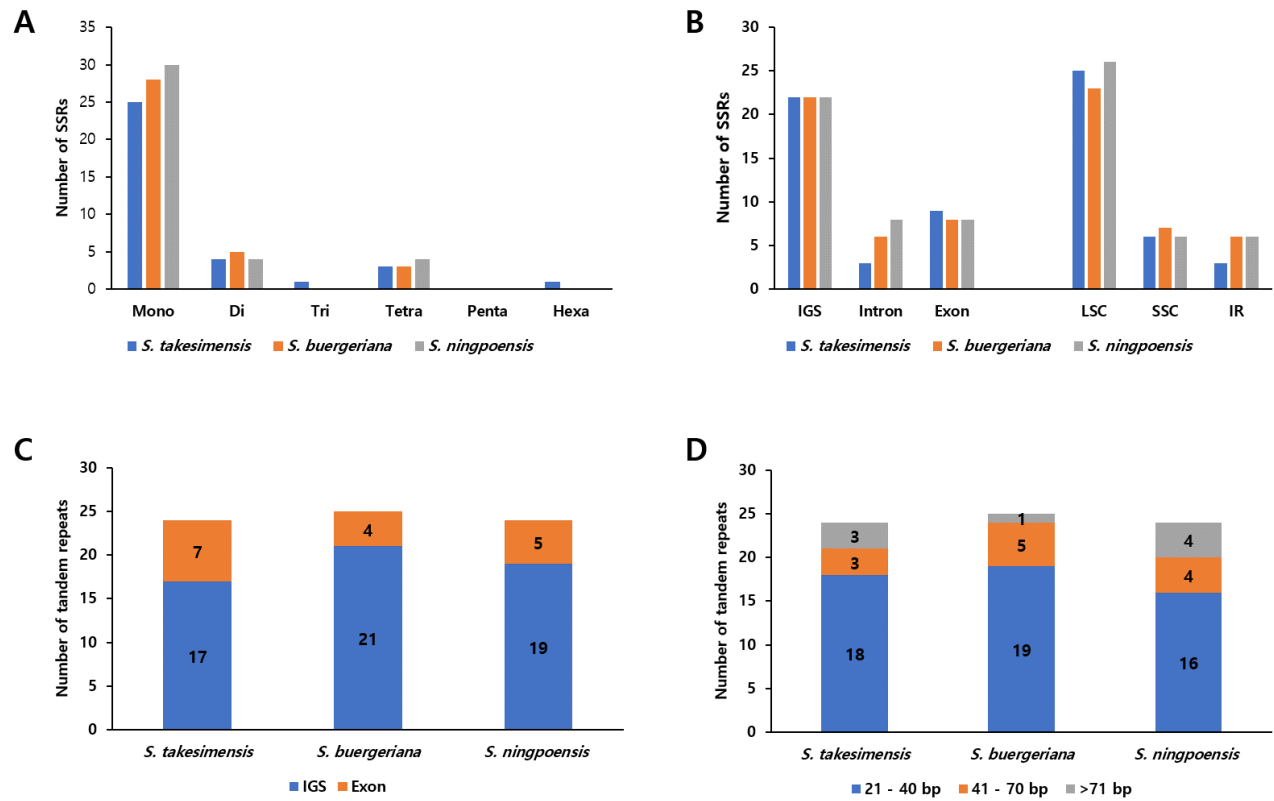

**Fig. S2. The distribution of the repeat sequences in *Scrophularia* chloroplast genomes. (A) Distribution of single sequence repeats (SSRs) types. (B) The number of SSRs in genomic regions. (C) Distribution of tandem repeats in genomic regions. (D) Distribution of lengths of the tandem repeats**

Table S1 Raw and trimmed read data

| Scientific name        | Input reads | Trimmed reads |        | Total raw bases | Trimmed bases  |        |
|------------------------|-------------|---------------|--------|-----------------|----------------|--------|
| <i>S. takesimensis</i> | 226,428,024 | 221,287,500   | 97.73% | 34,190,631,624  | 32,595,043,159 | 95.33% |

**Table S2 Genome assembly information for *S. takesimensis* chloroplast genomes**

| Scientific name        | Aligned reads (#) | Coverage (x) | Cp genome length (bp) |
|------------------------|-------------------|--------------|-----------------------|
| <i>S. takesimensis</i> | 29,525,085        | 8,000        | 152,420               |

**Table S3 Genes in the chloroplast genomes of *S. takesimensis* species**

| Group of genes                       | Name of genes                                                                                                                                                                                                                                                                                                                                                                                                                                                          |
|--------------------------------------|------------------------------------------------------------------------------------------------------------------------------------------------------------------------------------------------------------------------------------------------------------------------------------------------------------------------------------------------------------------------------------------------------------------------------------------------------------------------|
| Photosystem I                        | <i>psaA, B, C, I, J, ycf3<sup>2)</sup>, ycf4</i>                                                                                                                                                                                                                                                                                                                                                                                                                       |
| Photosystem II                       | <i>psbA, B, C, D, E, F, H, I, J, K, L, M, N, T, Z</i>                                                                                                                                                                                                                                                                                                                                                                                                                  |
| Cytochrome b6/f                      | <i>petA, B<sup>1)</sup>, D<sup>1)</sup>, G, L, N</i>                                                                                                                                                                                                                                                                                                                                                                                                                   |
| ATP synthase                         | <i>atpA, B, E, F<sup>1)</sup>, H, I</i>                                                                                                                                                                                                                                                                                                                                                                                                                                |
| Rubisco                              | <i>rbcL</i>                                                                                                                                                                                                                                                                                                                                                                                                                                                            |
| NADH oxidoreductase                  | <i>ndhA<sup>1)</sup>, B<sup>1)</sup> 3), C, D, E, F, G, H, I, J, K</i>                                                                                                                                                                                                                                                                                                                                                                                                 |
| Large subunit ribosomal proteins     | <i>rpl2<sup>1)</sup> 3), 14, 16<sup>1)</sup>, 20, 22, 23<sup>3)</sup>, 32, 33, 36</i>                                                                                                                                                                                                                                                                                                                                                                                  |
| Small subunit ribosomal proteins     | <i>rps2, 3, 4, 7<sup>3)</sup>, 8, 11, 12<sup>2)</sup> 3) 4), 14, 15, 16<sup>1)</sup>, 18, 19</i>                                                                                                                                                                                                                                                                                                                                                                       |
| RNA polymerase                       | <i>rpoA, B, C1<sup>1)</sup>, C2</i>                                                                                                                                                                                                                                                                                                                                                                                                                                    |
| Unknown function protein coding gene | <i>ycfI<sup>3)</sup>, 2<sup>3)</sup></i>                                                                                                                                                                                                                                                                                                                                                                                                                               |
| Other genes                          | <i>accD, ccsA, cemA, clpP<sup>2)</sup>, matK</i>                                                                                                                                                                                                                                                                                                                                                                                                                       |
| Ribosomal RNAs                       | <i>rrn16<sup>3)</sup>, 23<sup>3)</sup>, 4.5<sup>3)</sup>, 5<sup>3)</sup></i>                                                                                                                                                                                                                                                                                                                                                                                           |
| Transfer RNAs                        | <i>trnA-UGC<sup>1)</sup> 3), trnC-GCA, trnD-GUC, trnE-UUC, trnF-GAA, trnM-CAU, trnG-GCC, trnG-UCC<sup>1)</sup>, trnH-GUG, trnI-CAU<sup>3)</sup>, trnI-GAU<sup>1)</sup> 3), trnK-UUU<sup>1)</sup>, trnL-CAA<sup>3)</sup>, trnL-UAA<sup>1)</sup>, trnL-UAG, trnM-CAU, trnN-GUU<sup>3)</sup>, trnP-UGG, trnQ-UUG, trnR-ACG<sup>3)</sup>, trnR-UCU, trnS-GCU, trnS-GGA, trnS-UGA, trnT-GGU, trnT-UGU, trnV-GAC<sup>3)</sup>, trnV-UAC<sup>1)</sup>, trnW-CCA, trnY-GUA</i> |

1) Gene containing a single intron, 2) gene containing two introns, 3) two gene copies in IRs, 4) trans-splicing gene

**Table S4 Genic introns in *S. takesimensis* chloroplast genomes**

|    | Gene     | Region | exon I | intron I | exon II | intron II | exon III |
|----|----------|--------|--------|----------|---------|-----------|----------|
| 1  | trnk-UUU | LSC    | 37     | 37       | 2509    | 35        |          |
| 2  | rps16    | LSC    | 39     | 44       | 846     | 223       |          |
| 3  | trnG-UCC | LSC    | 23     | 23       | 684     | 47        |          |
| 4  | rpoC1    | LSC    | 435    | 144      | 722     | 411       |          |
| 5  | ycf3     | LSC    | 126    | 435      | 757     | 1620      |          |
| 6  | trnL-UAA | LSC    | 37     | 128      | 707     | 227       | 726      |
| 7  | trnV-UAC | LSC    | 39     | 37       | 488     | 50        |          |
| 8  | rps12    | LSC    | 114    | 38       | 584     | 37        |          |
| 9  | clpP     | LSC    | 69     | 114      |         | 232       |          |
| 10 | petB     | LSC    | 6      | 69       | 730     | 291       | 634      |
| 11 | petD     | LSC    | 8      | 6        | 722     | 642       |          |
| 12 | rpl16    | LSC    | 9      | 8        | 734     | 475       |          |
| 13 | rpl2     | LSC    | 393    | 9        | 883     | 399       |          |
| 14 | ndhB     | IR     | 777    | 393      | 664     | 435       |          |
| 15 | trnI-GAU | IR     | 42     | 777      | 679     | 756       |          |
| 16 | trnA-UGC | IR     | 38     | 42       | 945     | 35        |          |
| 17 | ndhA     | SSC    | 552    | 38       | 813     | 35        |          |

**Table S5 Voucher specimen information for floral micromorphology, palynology, and chloroplast genomes, DNA barcode analysis used in this study**

| No. | Species                | Collection information                                                    | Coordinates                   | Collector <i>collection no.</i><br>(Herbarium acronym)                  |
|-----|------------------------|---------------------------------------------------------------------------|-------------------------------|-------------------------------------------------------------------------|
| 1   |                        | Deogyusan Mt., Seolcheon-myeon,<br>Muju-gun, Jeollabuk-do, Korea          | 35°51'27.9"N<br>127°43'18.9"E | B. Choo & Y. Ji <i>KIOM200901002023</i><br>(KIOM) <sup>C, M, P, D</sup> |
| 2   | <i>S. takesimensis</i> | Cheonhwangsan Mt., Icheon-ri,<br>Sangbuk-myeon, Ulju-gun, Ulsan,<br>Korea | 35°33'29.4"N<br>128°58'26.4"E | S.C. Ko <i>KIOM201601018272</i><br>(KIOM) <sup>M, P, D</sup>            |
| 3   |                        | Baegunsan Mt., Gwangyang-si,<br>Jeollanam-do, Korea                       | 35°03'06.1"N<br>127°35'31.8"E | Y. Ji & B. Moon <i>KIOM201101004181</i><br>(KIOM) <sup>M, P</sup>       |



**Table S6 Chloroplast genomes from NCBI used for phylogenetic analysis**

| No. | Tribe            | Taxon                            | GenBank accession number |
|-----|------------------|----------------------------------|--------------------------|
| 1   | Scrophulariaceae | <i>Scrophularia takesimensis</i> | KP718628                 |
| 2   |                  | <i>Scrophularia dentata</i>      | KT428154                 |
| 3   |                  | <i>Scrophularia takesimensis</i> | NC_026202                |
| 4   |                  | <i>Scrophularia buergeriana</i>  | NC_031437                |
| 5   |                  | <i>Scrophularia dentata</i>      | NC_036942                |
| 6   |                  | <i>Scrophularia henryi</i>       | NC_036943                |
| 7   |                  | <i>Scrophularia ningpoensis</i>  | NC_053823                |
| 8   |                  | <i>Scrophularia cephalantha</i>  | NC_057296                |
| 9   |                  | <i>Verbascum phoeniceum</i>      | NC_050920                |
| 10  |                  | <i>Verbascum chinense</i>        | NC_051533                |
